# Supplementary material
Source: Springer Nature journal article supplement (http://www.springermedizin.de/resource/supplementary/13049_2009_53_MOESM17_ESM.pdf/9665786)

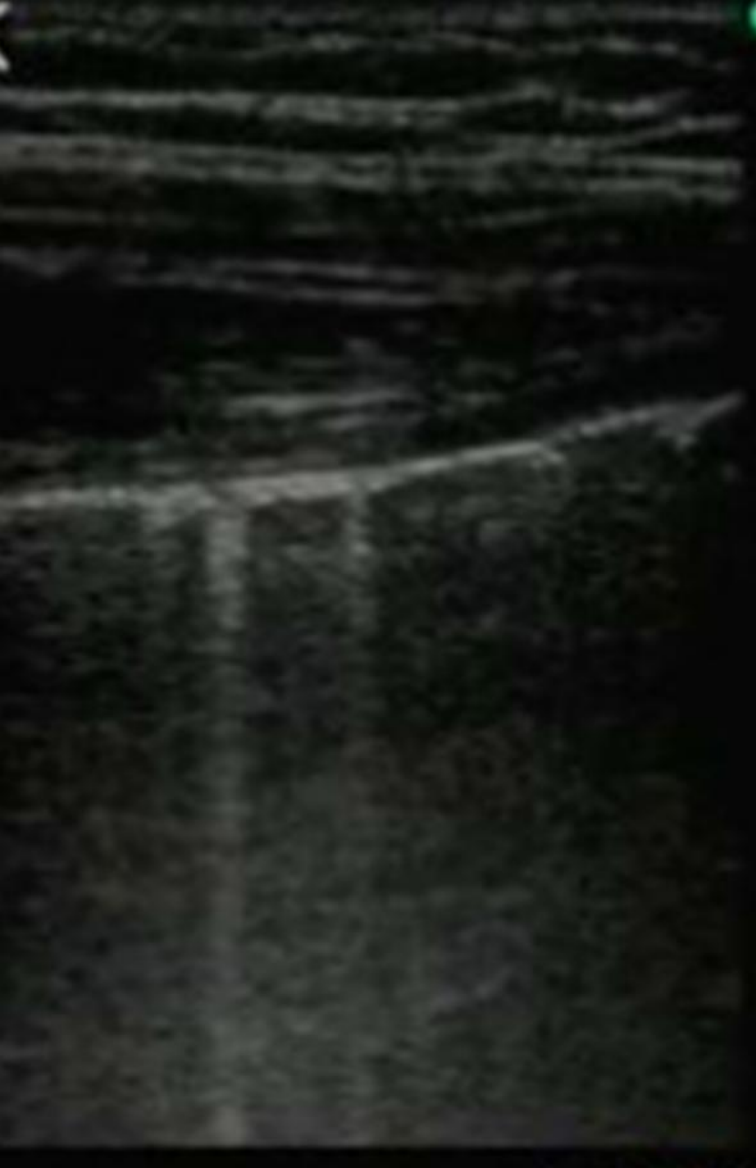

Supplement: MOESM17 [file 9665786]
